# Supplementary material
Source: Springer Nature journal article supplement (https://www.springermedizin.de/resource/supplementary/12889_2010_2699_MOESM1_ESM.pdf/9487144)

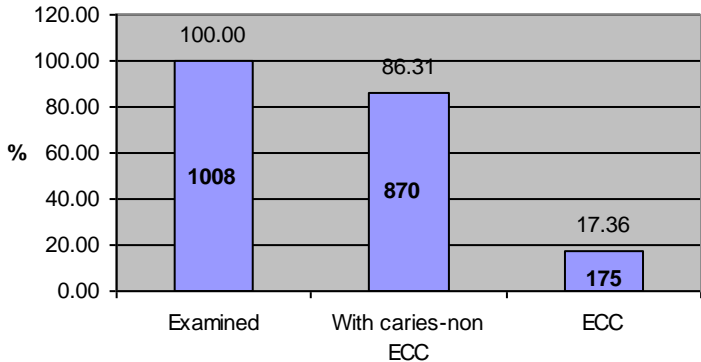

Supplement: MOESM1 [file 9487144]
